# Supplementary material
Source: Copernicus journal article supplement (doi:10.5194/egusphere-2026-1713)
Supplement: Supplementary file [file egusphere-2026-1713-AC1-supplement.pdf]

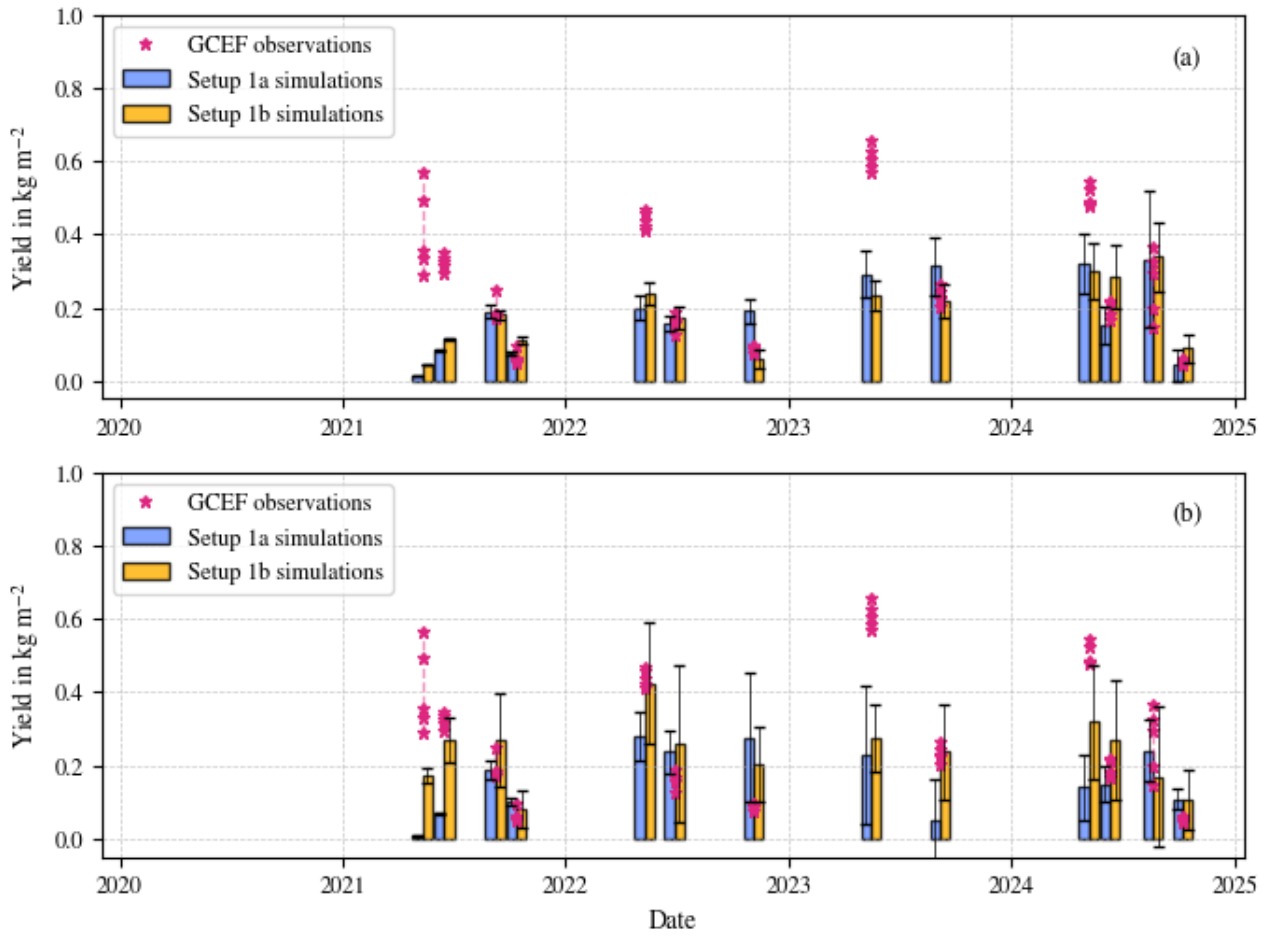

Figure 1: a) old results with restart of GRASSMIND b) new results with implemented plowing

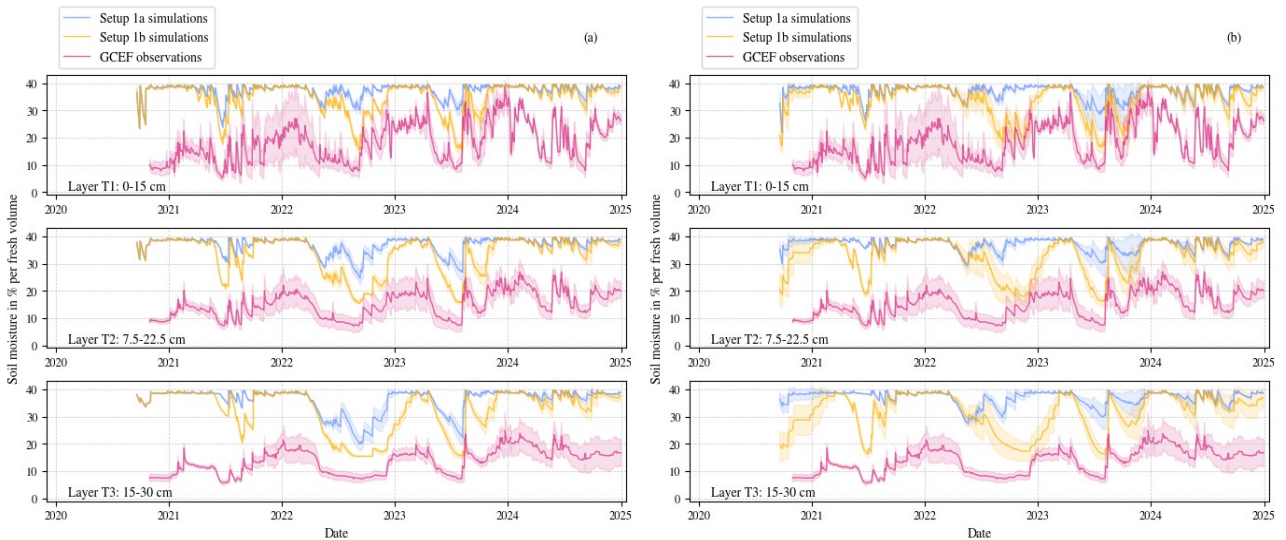

Figure 2: a) old results with restart of GRASSMIND b) new results with implemented plowing

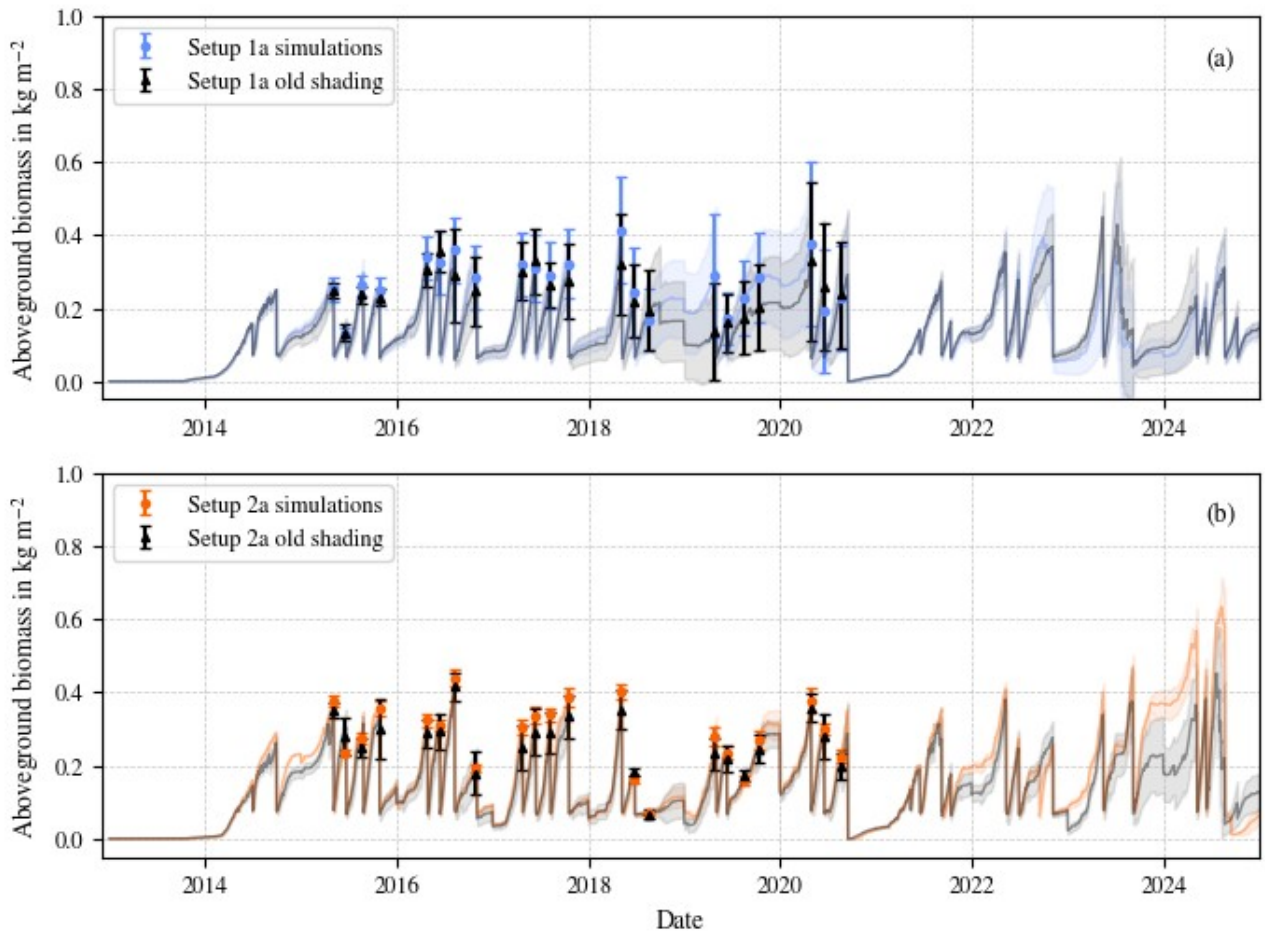

Figure 3: comparison of the used shading scheme and the old one for GRASSMIND (a) and GRASSMIND-BODIUM (b)
